# Supplementary material for: HGF Secreted by Activated Kupffer Cells Induces Apoptosis of Plasmodium-Infected Hepatocytes
Source: PubMed Central journal article supplement (PMC5292919; doi:10.3389/fimmu.2017.00090), 2017-02-06
Supplement: presentation_1.pdf [file presentation_1.pdf]

## HGF secreted by Activated Kupffer Cells Induces Apoptosis of Plasmodium-Infected Hepatocytes

Lígia Antunes Gonçalves, Joana Rodo, Lurdes Rodrigues-Duarte, Luciana Vieira de Moraes and Carlos Penha-Gonçalves

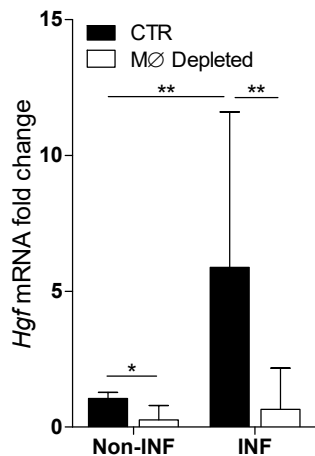

**Depletion of liver macrophages decreases *Hgf* mRNA expression.** Macrophages depleted (*MØ* depleted) *in vivo* by clodronate-containing liposomes show reduced *Hgf* mRNA expression in total livers of non-infected (Non-INF) and infected (INF) mice, and is evidenced in the INF group. *Hgf* mRNA expression was measured by qRT-PCR in six livers per mouse group, all from C57BL/6 mouse strain. (Non-parametric Mann-Whitney test,  $p < 0.05$  (\*) and  $p \leq 0.001$  (\*\*))
